# Supplementary figures and images for: RalA and the exocyst complex influence neuronal polarity through PAR-3 and aPKC
Source: Oxford University Press journal article supplement (doi:10.1242/jcs.044339), 2009-04-22

**A**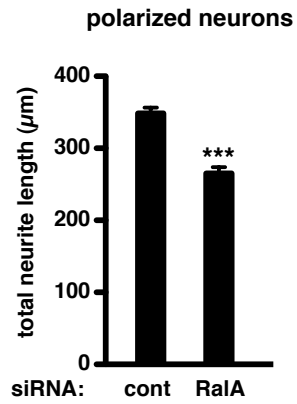**B**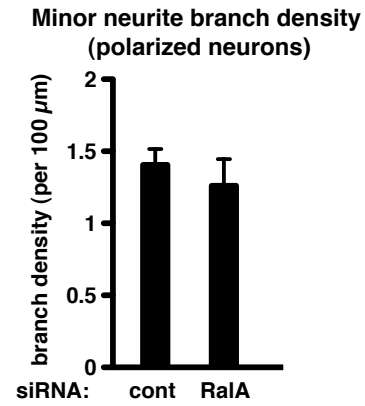**C**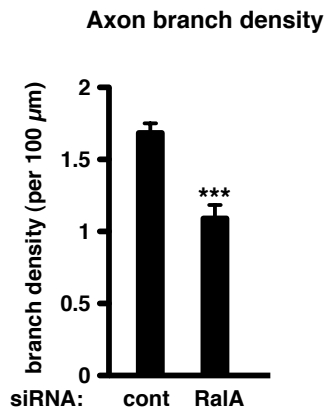**D**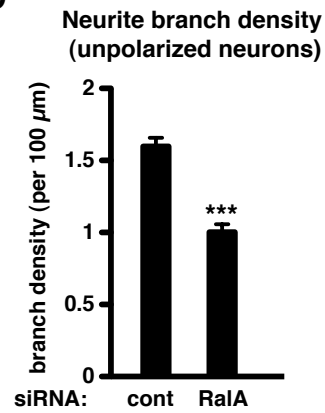**E**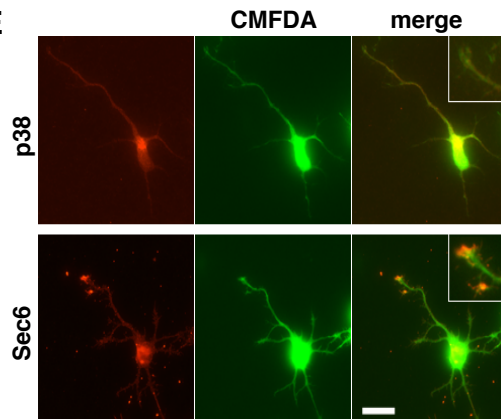

**Fluorescence ratiometric analysis**

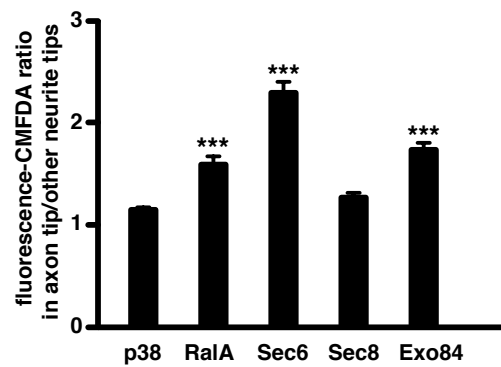

Supplement: jcs044339-sup-044339-figs1.pdf [file jcs044339-sup-044339-figs1.pdf]

**A**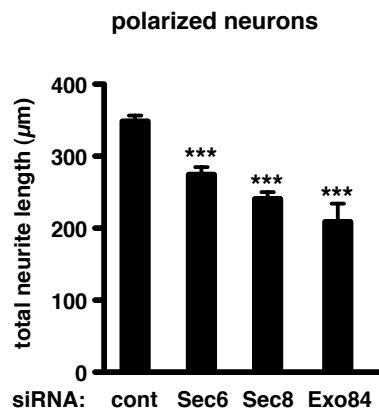**B**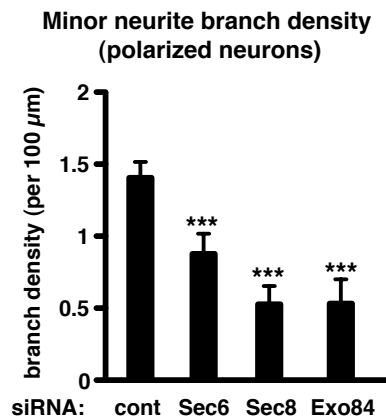**C**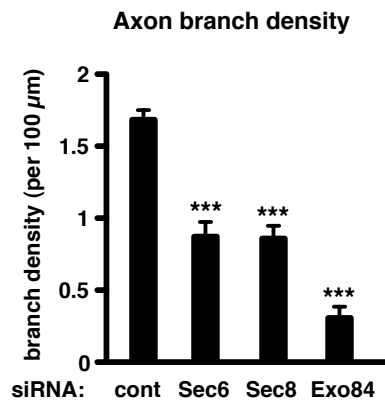

Supplement: jcs044339-sup-044339-figs2.pdf [file jcs044339-sup-044339-figs2.pdf]

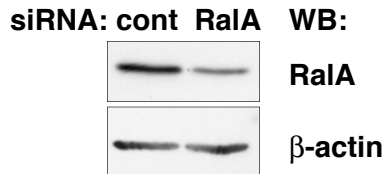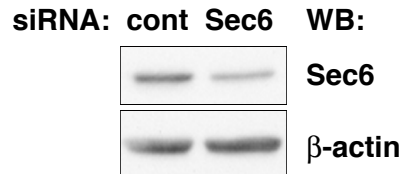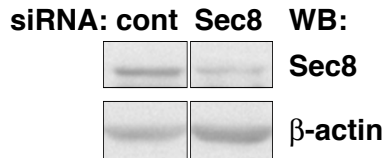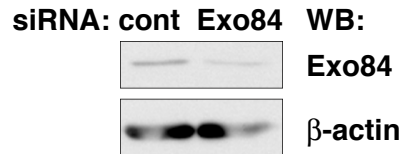

Supplement: jcs044339-sup-044339-figs3.pdf [file jcs044339-sup-044339-figs3.pdf]
